# Supplementary material
Source: PubMed Central journal article supplement (PMC7967289)

**Supplemental Figure 1. Study Flow Diagram**

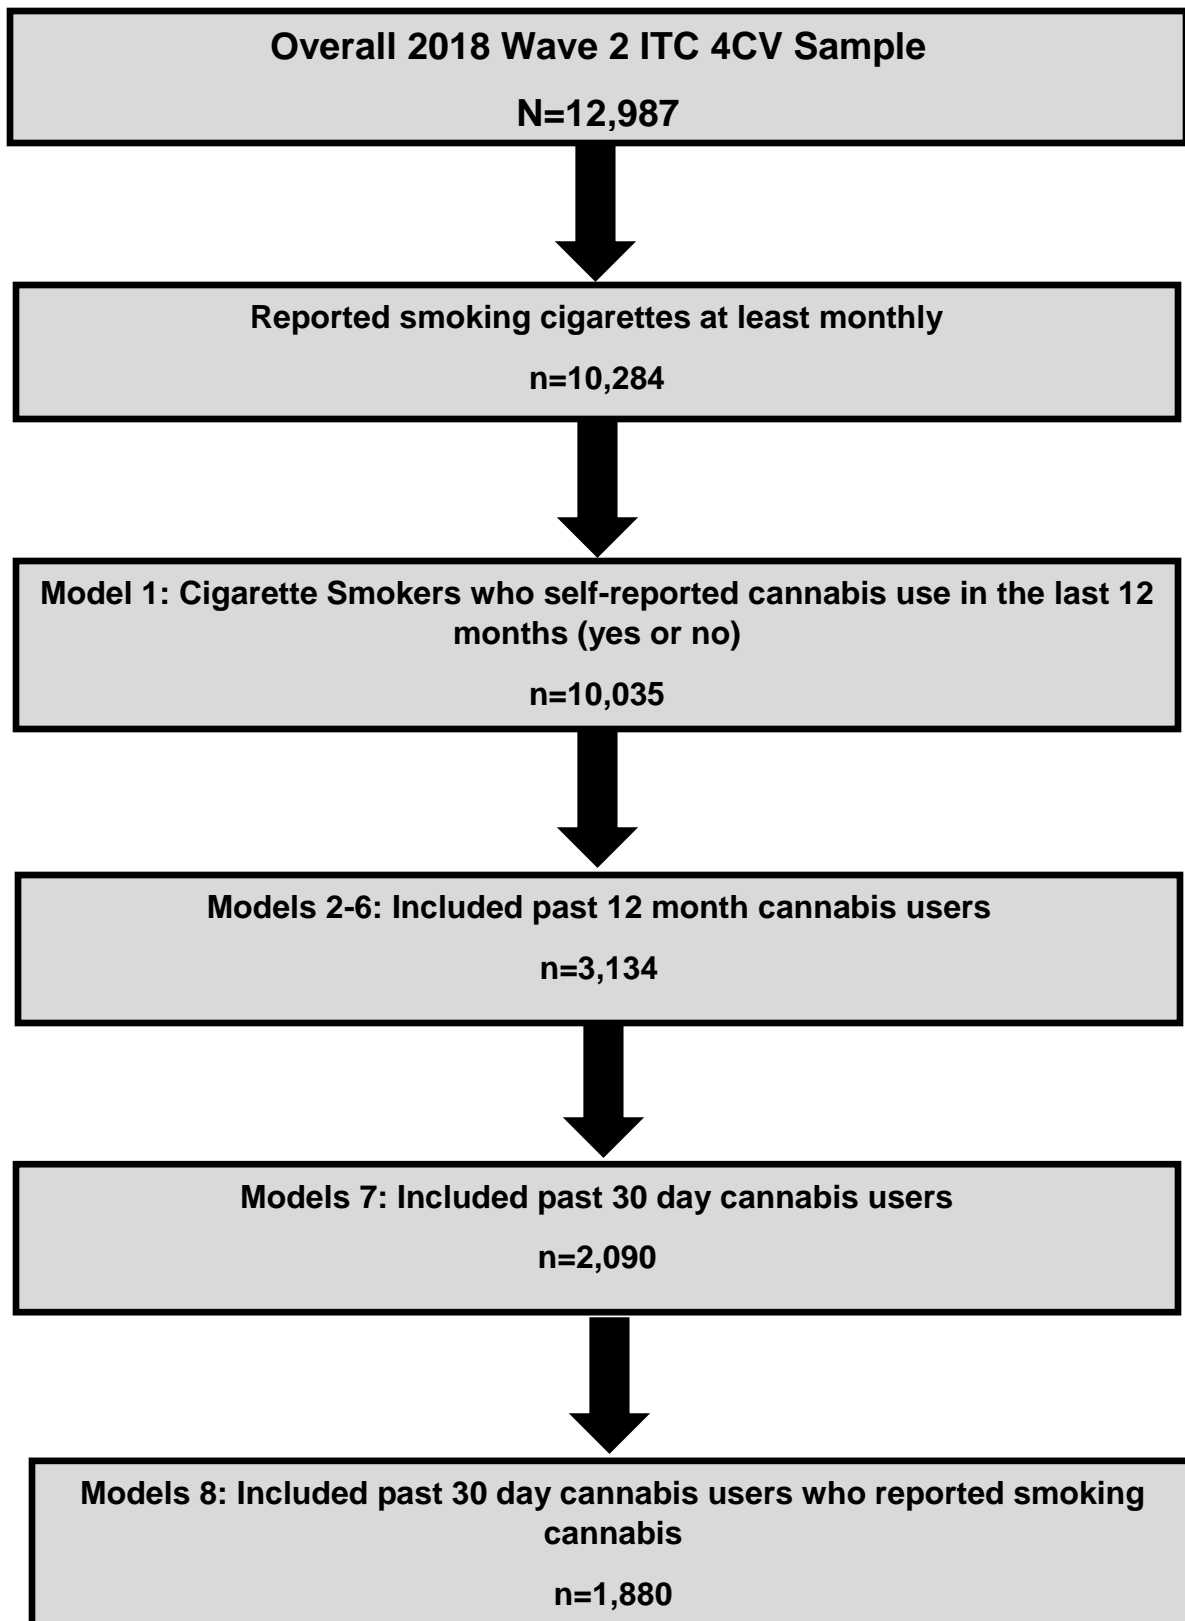

Supplement: NIHMS1585867-supplement-1.pdf [file NIHMS1585867-supplement-1.pdf]
